# Supplementary material for: Facile fabrication of zinc oxide coated superhydrophobic and superoleophilic meshes for efficient oil/water separation
Source: Royal Society of Chemistry journal article supplement (doi:10.1039/c8ra06059b), 2018-01-01
Supplement: c8ra06059b3.pdf [file c8ra06059b3.pdf]

## Facile Fabrication of Zinc Oxide Coated Superhydrophobic and Superoleophilic Meshes for Efficient Oil/Water Separation

Yuezhong Zhang,<sup>\*a</sup> Xiaoyu Wang,<sup>b</sup> Chunhui Wang,<sup>b</sup> Jiangjiang Liu,<sup>b</sup> Hongbiao Zhai,<sup>b</sup> Baosheng Liu,<sup>\*b</sup> Xudong Zhao,<sup>a</sup> and Daqing Fang<sup>b</sup>

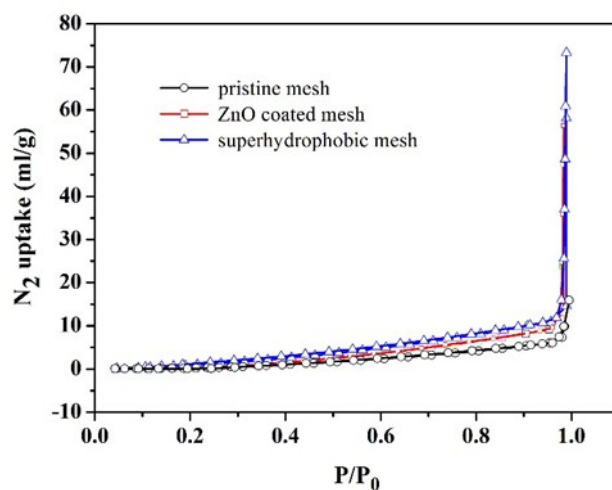

Fig. S1. N<sub>2</sub> adsorption-desorption isotherms at 77 K.
